# Supplementary material for: Two PTP receptors mediate CSPG inhibition by convergent and divergent signaling pathways in neurons
Source: PubMed Central journal article supplement (PMC5111048; doi:10.1038/srep37152), 2016-11-16
Supplement: srep37152-s1.pdf [file srep37152-s1.pdf]

**Two PTP receptors mediate CSPG inhibition by convergent and divergent signaling pathways in neurons**

*Yosuke Ohtake, Daniella Wong, P. M. Abdul-Muneer, Michael E. Selzer, and Shuxin Li*

**Supplemental Table 1.** Comparison of the results with two loading proteins: actin and total signaling protein.

| Proteins            | Fig. | N2A cells            |                  | CGNs             |            | N2A cells        |                  | CGNs      |  | Activity |
|---------------------|------|----------------------|------------------|------------------|------------|------------------|------------------|-----------|--|----------|
|                     |      | PTP $\sigma$ -Transf | PTP $\sigma$ +/+ | PTP $\sigma$ -/- | LAR-Transf | LAR +/+          | LAR -/-          |           |  |          |
| p-Cofilin/actin     | S1   | ↔ p = 0.195          | ND               | ND               | ↑ p < 0.01 | ↑ p < 0.05       | ↔ p = 0.9886     | ↓ by LAR  |  |          |
| p-Cofilin/T-Cofilin | 2    | ↔ p = 0.234          | ND               | ND               | ↑ p < 0.01 | ↑ p < 0.05       | ↔ p = 0.4838     | ↓ by LAR  |  |          |
| p-Akt/actin         | S1   | ↓ p < 0.01           | ↓ p < 0.01       | ↔ p = 0.974      | ↓ p < 0.01 | ND               | ND               | ↓ by both |  |          |
| p-Akt/T-Akt         | 2    | ↓ p < 0.01           | ↓ p < 0.01       | ↔ p = 0.879      | ↓ p < 0.01 | ↓ (Fisher et al) | ↔ (Fisher et al) | ↓ by both |  |          |
| p-LKB1/actin        | S2   | ↔ p = 0.261          | ND               | ND               | ↓ p < 0.01 | ↓ p < 0.05       | ↔ p = 0.7875     | ↓ by LAR  |  |          |
| p-LKB1/ T-LKB1      | 5    | ↔ p = 0.302          | ND               | ND               | ↓ p < 0.01 | ↓ p < 0.05       | ↔ p = 0.9189     | ↓ by LAR  |  |          |

Note: ND: not determined.

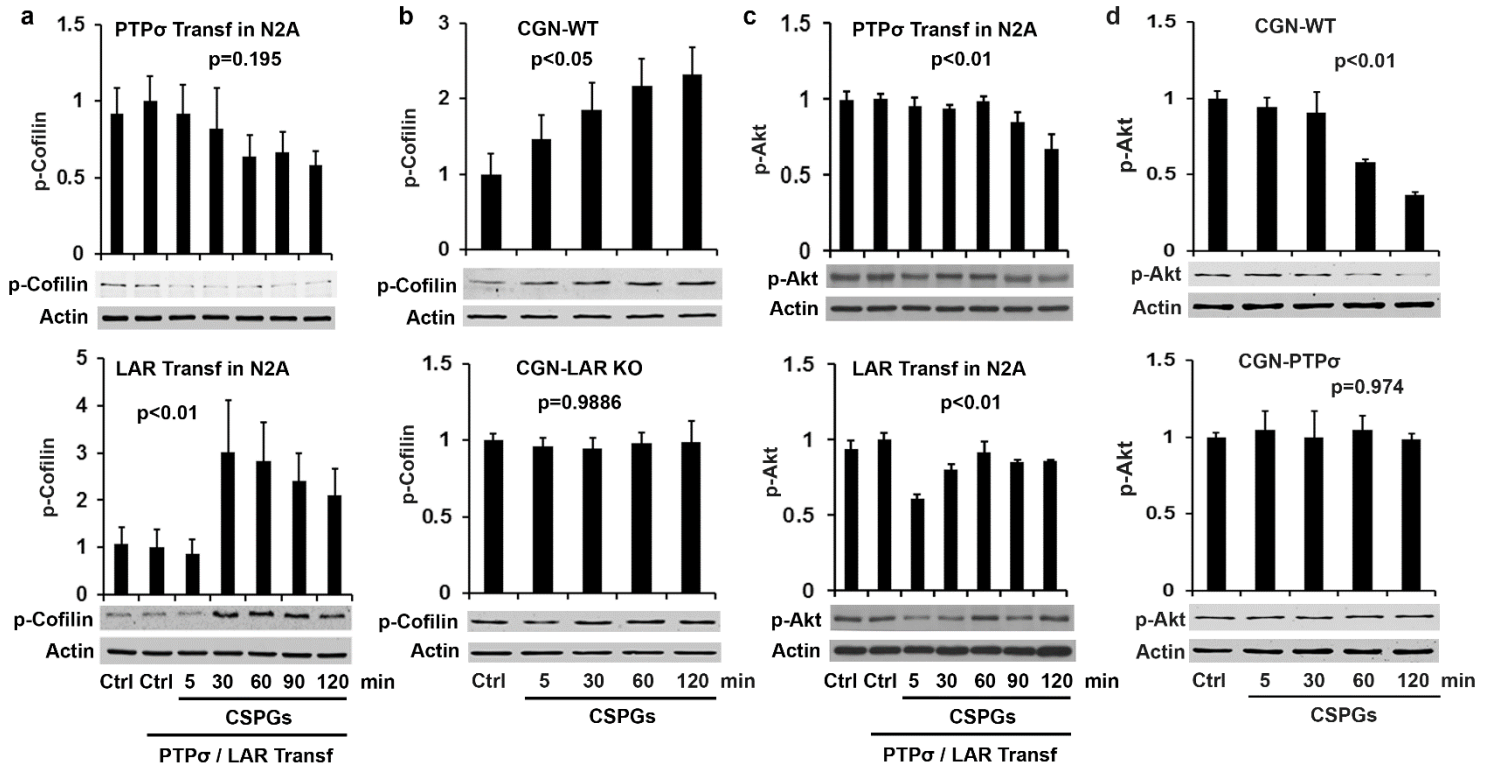

**Supplemental figure 1** Effect of CSPG on activities of cofilin and Akt in N2A cells or CGNs measured with actin as a loading protein. PTP $\sigma$  or LAR transfected N2A cells or CGNs derived from PTP $\sigma$  or LAR KO mice were treated with purified CSPGs (1.5  $\mu$ g/ml) for different lengths of time, and the levels of phosphorylated Cofilin (p-Cofilin Ser3, inactive form, **a** and **b**) and Akt (p-Akt s473, active form, **c** and **d**) in the cell lysates were measured by Western blots. The levels of p-Cofilin and p-Akt were calibrated with levels of actin in the same samples, instead of with total Cofilin and Akt as in Fig. 2. Use of actin as a loading control indicated the same alterations of these signaling proteins as in Fig. 2.

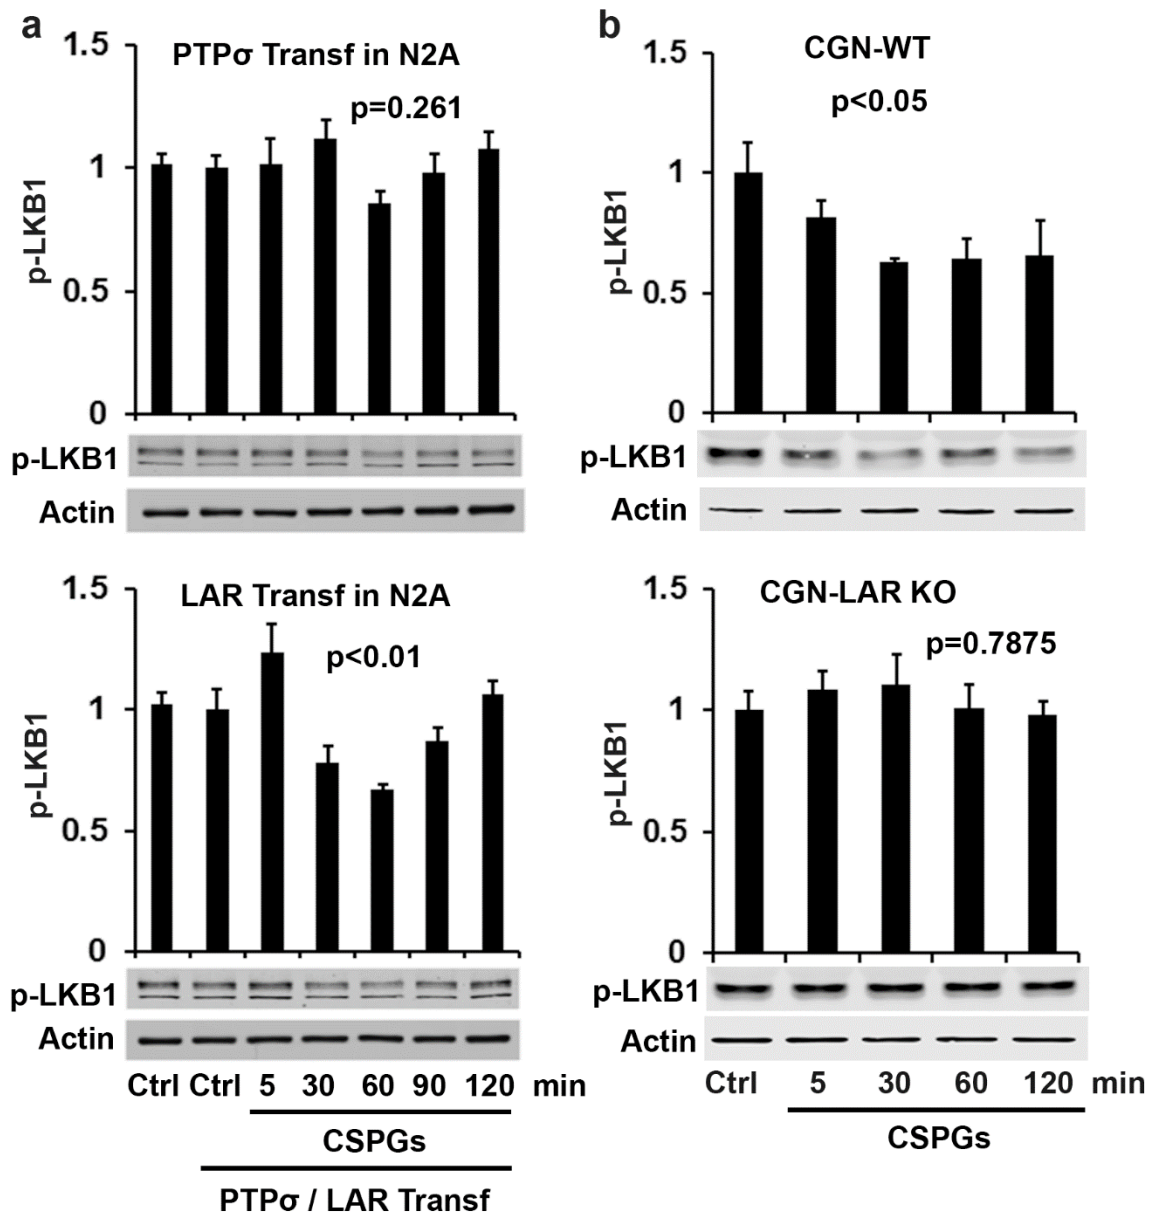

**Supplemental figure 2** Effect of CSPG application on activities of LKB1 in N2A cells or CGNs, measured with actin as a loading protein. PTP $\sigma$ /LAR transfected N2A cells or CGNs derived from LAR KO mice were treated with purified CSPGs (1.5  $\mu$ g/ml) for several lengths of time and the levels of phosphorylated LKB1 (p-LKB1 Ser431, active form) in the cell lysates were measured by Western blots. The levels of p-LKB1 were calibrated with levels of actin in the same samples, instead of with total LKB1 as in Fig. 5. Use of actin as a loading control consistently showed that CSPGs stimulation decreased levels of p-LKB1 in LAR, not PTP $\sigma$ , transfected N2A cells (a), and in LAR $^{+/+}$ , not LAR $^{-/-}$ , CGNs (b).

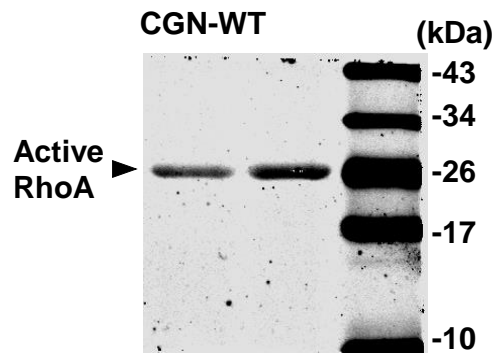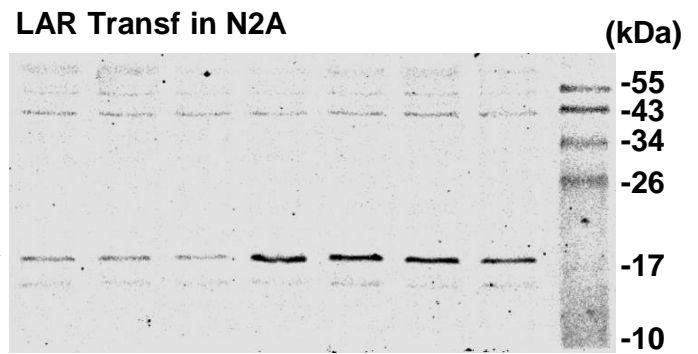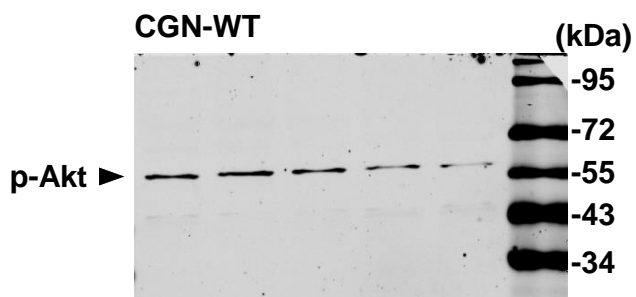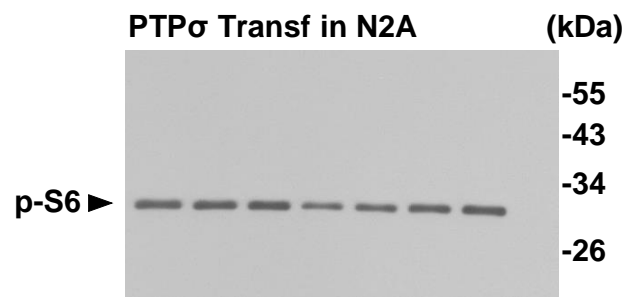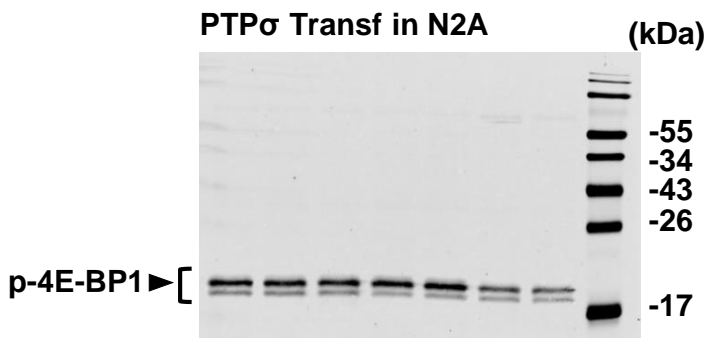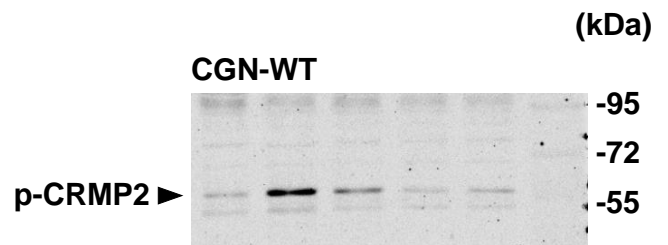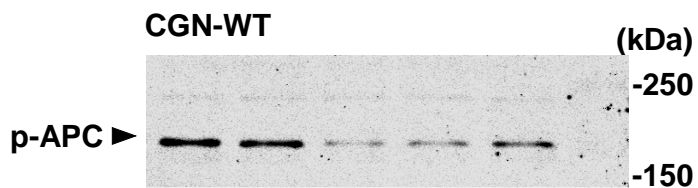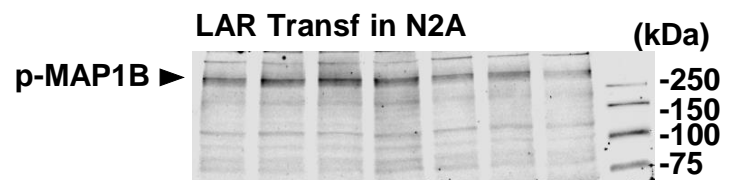

**Supplemental figure 3** *The full-length blots are shown for active RhoA, p-Cofilin, p-Akt, p-S6, p-4E-BP, p-CRMP2, p-APC, and p-MAP1B.*

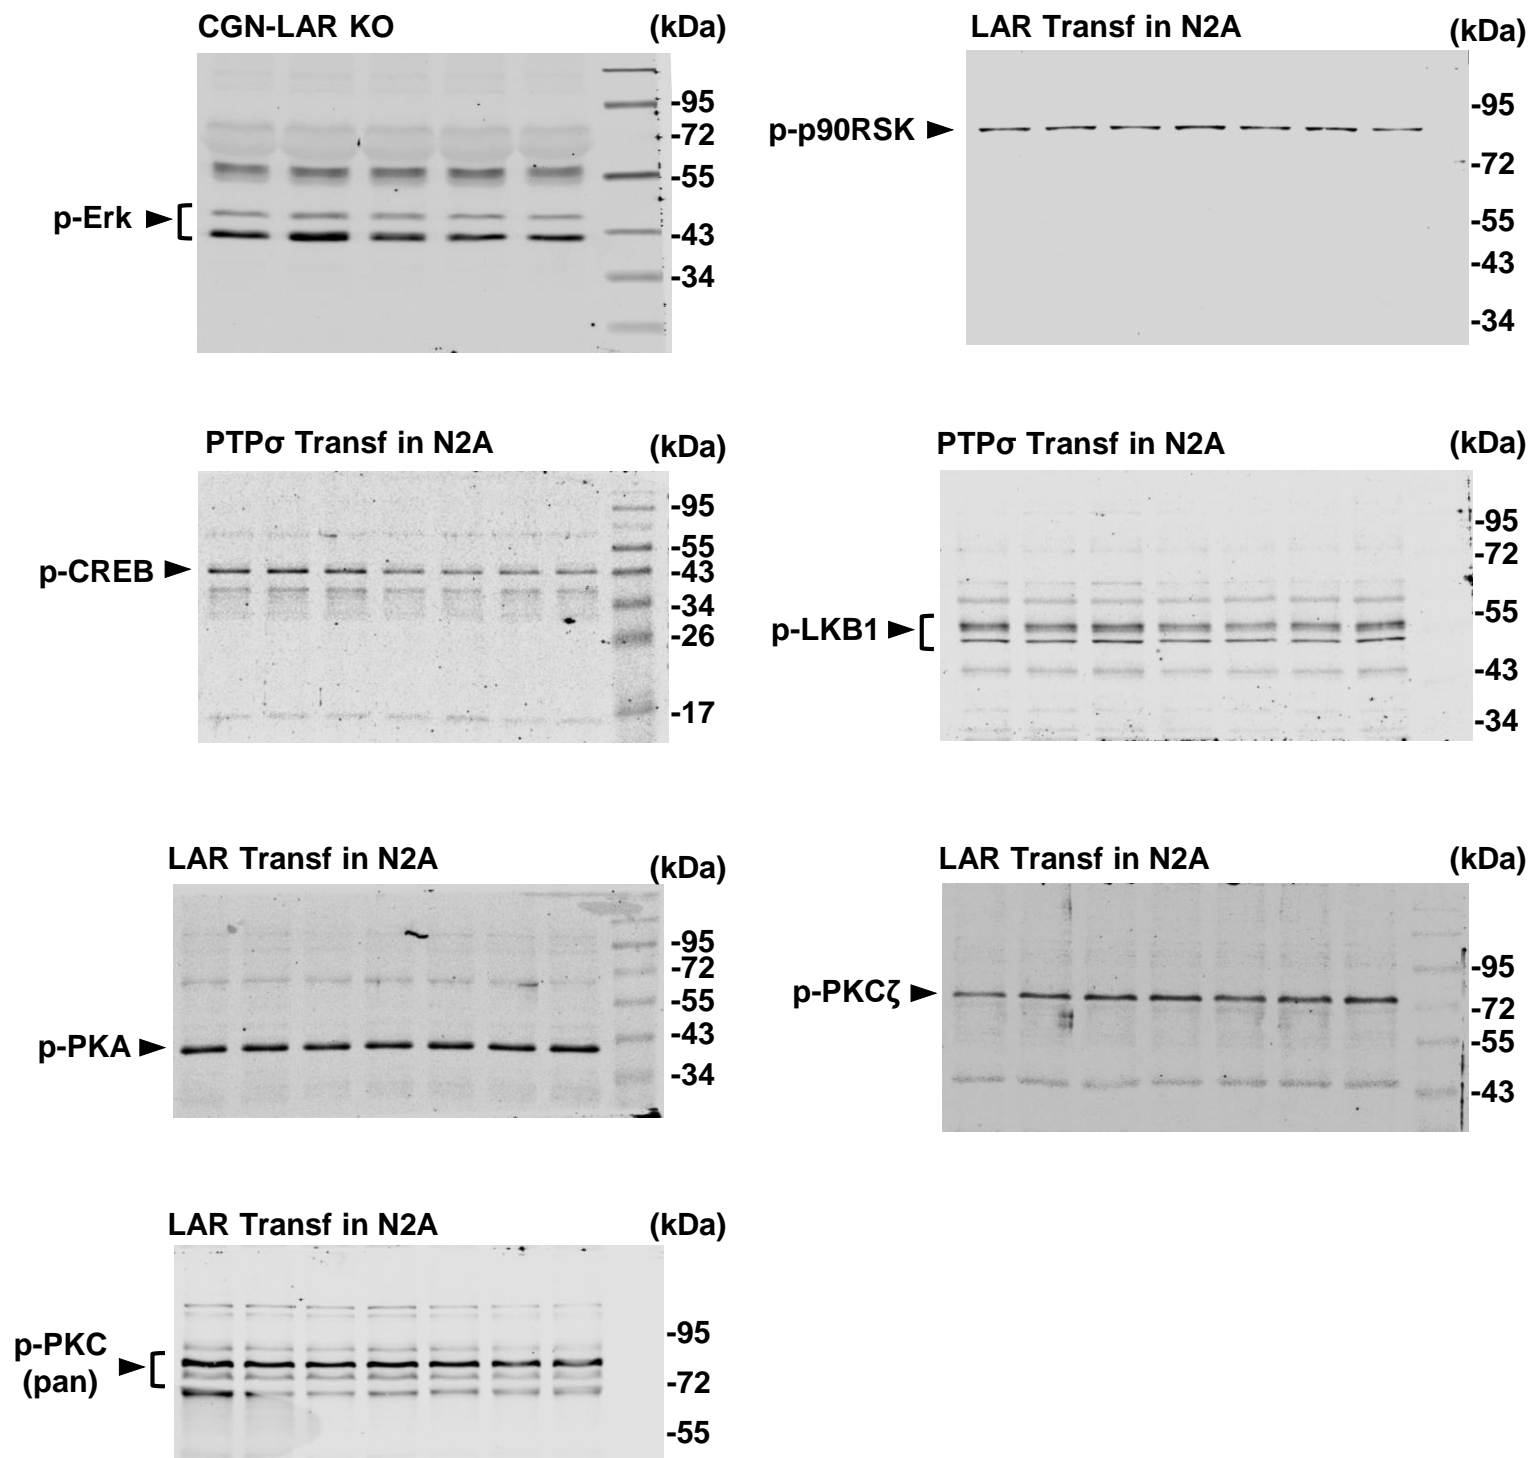

**Supplemental figure 4** *The full-length blots are shown for p-Erk, p-p90RSK, p-CREB, p-LKB1, p-PKA, p-PKCζ, and p-PKC(pan).*
